# Supplementary material for: Induction and maintenance of bi-functional (IFN-γ + IL-2+ and IL-2+ TNF-α+) T cell responses by DNA prime MVA boosted subtype C prophylactic vaccine tested in a Phase I trial in India
Source: PLoS One. 2019 Mar 28;14(3):e0213911. doi: 10.1371/journal.pone.0213911 (PMC6438518; doi:10.1371/journal.pone.0213911)
Supplement: S1 Table — (XLSX) [file pone.0213911.s002.xlsx]

## Sheet: S1 Table
	Supplementary Table 1: Commercial reagents used for multicolor flow cytometry ICS Assay
		Intracellular Cytokine assay Panel
			Specificity	Flurochrome	Clone	Vendor	Catalog Number	Vol/test
			CD3	APC H7	SK7	BD-Pharminogen	557832	2.5UL
			CD8	APC R 700	RPA-T8	BD-Pharminogen	565165	2.5UL
			CD4	BUV737	RPA-T4	BD-Pharminogen	564305	2.5UL
			CCR7	PeCY7	3D12	BD-Pharminogen	557648	5UL
			CD45RO	BUV395	UCHL1	BD-Pharminogen	564291	5UL
			IFN-g	APC	B27	BD-Pharminogen	554702	5UL
			TNF-α	FITC	Mab11	BD-Pharminogen	554512	5UL
			IL-2	PE	MQ1-17HI2	BD-Pharminogen	559334	20UL
			Dead cells	Aqua Blue	--	Invitrogen	L34962	01:20:00
